# Supplementary material for: Effect of PMMA/Silica Hybrid Particles on Interfacial Adhesion and Crystallization Properties of Poly(lactic acid)/Block Acrylic Elastomer Composites
Source: MDPI journal article supplement (doi:10.3390/polym12102231), 2020-09-28
Supplement: s1 [file s1]

## Thermal gravimetric analysis (TGA) of the PLA and PLA composites

Figure S2 and Table S1 show the thermal degradation properties of neat PLA and PLA composites. The PLA composites with PMMA/silica hybrid particles exhibit slightly enhanced thermal decomposition properties, but the particles are considered to have a minor effect. The silica content was similar to the expected value based on the residual amount.

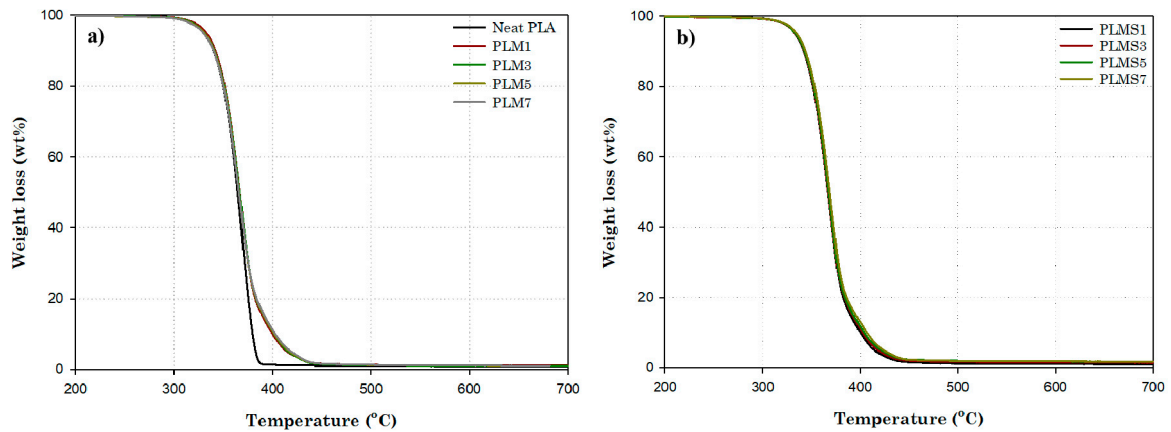

**Figure S2.** TGA curves of neat PLA and PLA composites: (a) neat PLA and PLM and (b) PLMS samples.

**Table S1.** Thermal degradation properties of Neat PLA and PLA composites and residue

| Sample   | $T_{10}$ (°C) | $T_{50}$ (°C) | Residue (wt.%)          | Silica content (wt.%) |
|----------|---------------|---------------|-------------------------|-----------------------|
| Neat PLA | 339.93        | 364.44        | 0.82                    | -                     |
| PLM1     | 341.85        | 366.66        | 1.07                    | -                     |
| PLM3     | 341.04        | 366.52        | 0.90                    | -                     |
| PLM5     | 340.58        | 365.83        | 1.06                    | -                     |
| PLM7     | 340.12        | 365.76        | 1.08                    | -                     |
| PLMS1    | 342.05        | 366.68        | 1.00(0.17) <sup>a</sup> | 0.1 <sup>b</sup>      |
| PLMS3    | 342.39        | 366.87        | 1.46(0.51)              | 0.56                  |
| PLMS5    | 342.81        | 367.38        | 1.79(0.85)              | 0.89                  |
| PLMS7    | 343.93        | 366.80        | 1.81(1.19)              | 0.91                  |

a: calculated theoretical silica content(wt.%), b : TGA analysis

### Morphological analysis of the PLA and PLA composites

Figure S3 shows a SEM image and transformed image of the PLM7 morphology. The dispersed morphology occupied by each acrylic elastomer was calculated using software, and the occupied area was taken as a circle to enable a calculation of the diameter. Here, to reduce the error, areas of less than  $0.01 \mu\text{m}^2$  were neglected.

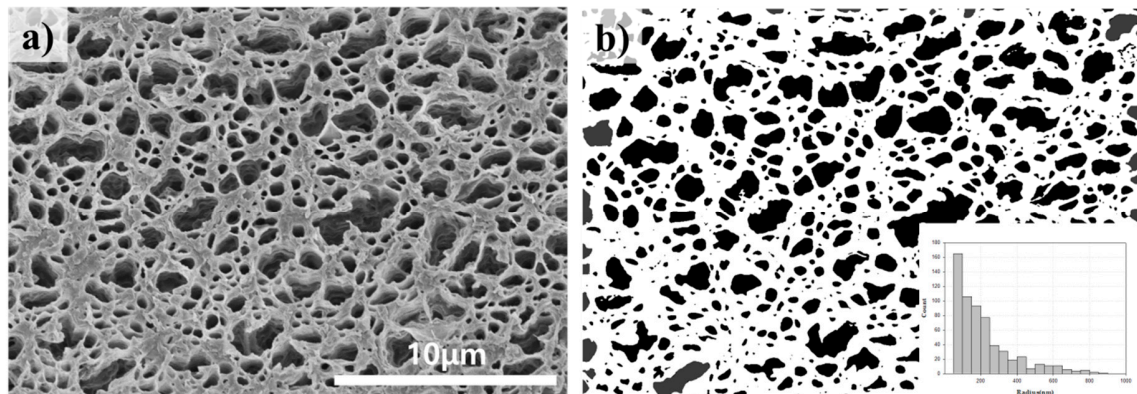

Figure S3. Morphology of the PLM7: (a) SEM image and (b) image analysis and particle size distribution histogram.

### DSC analysis of the PLA and PLA composites

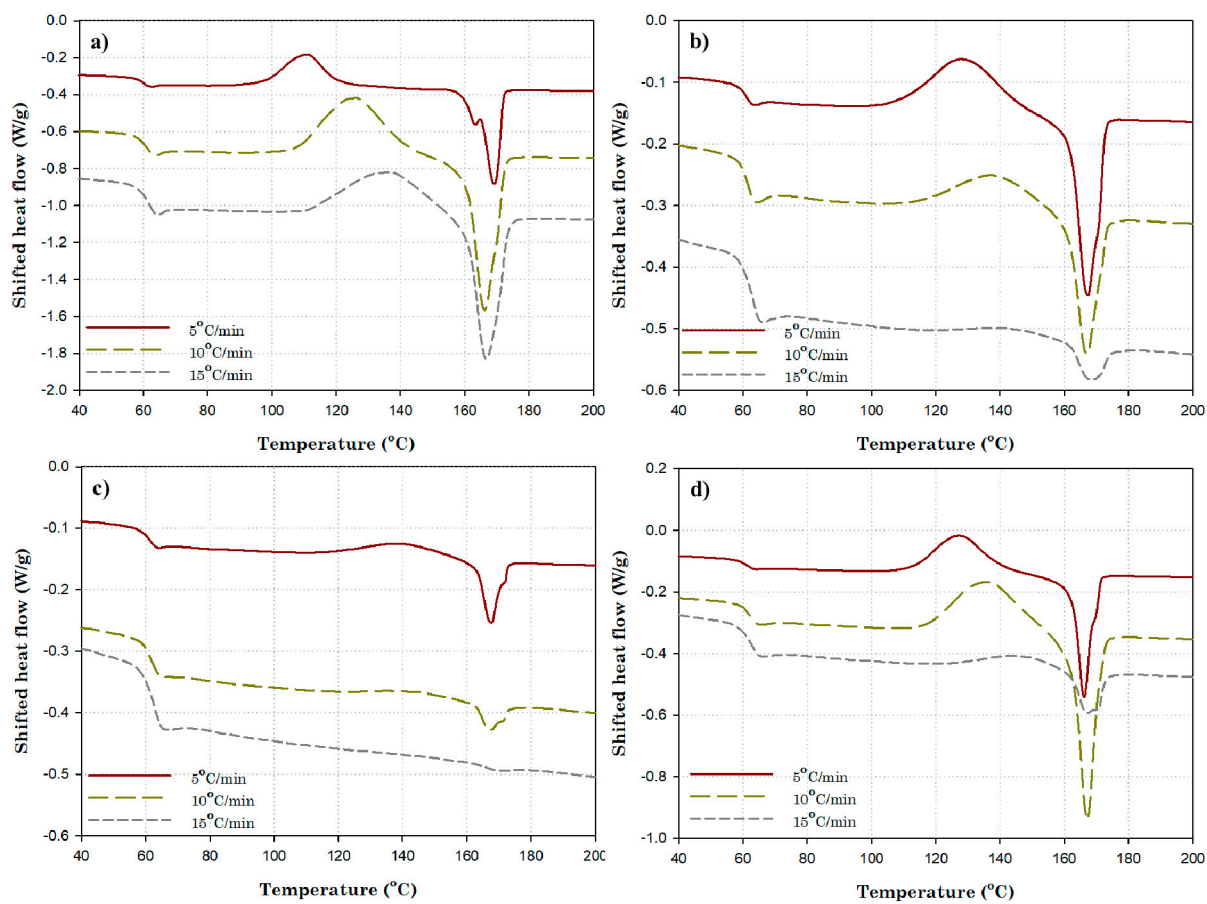

**Figure S4.** DSC thermograms for (a) neat PLA, (b) PL7/3, (c) PLM7, and (d) PLMS7 at heating rates of 5, 10, and 15 °C/min.

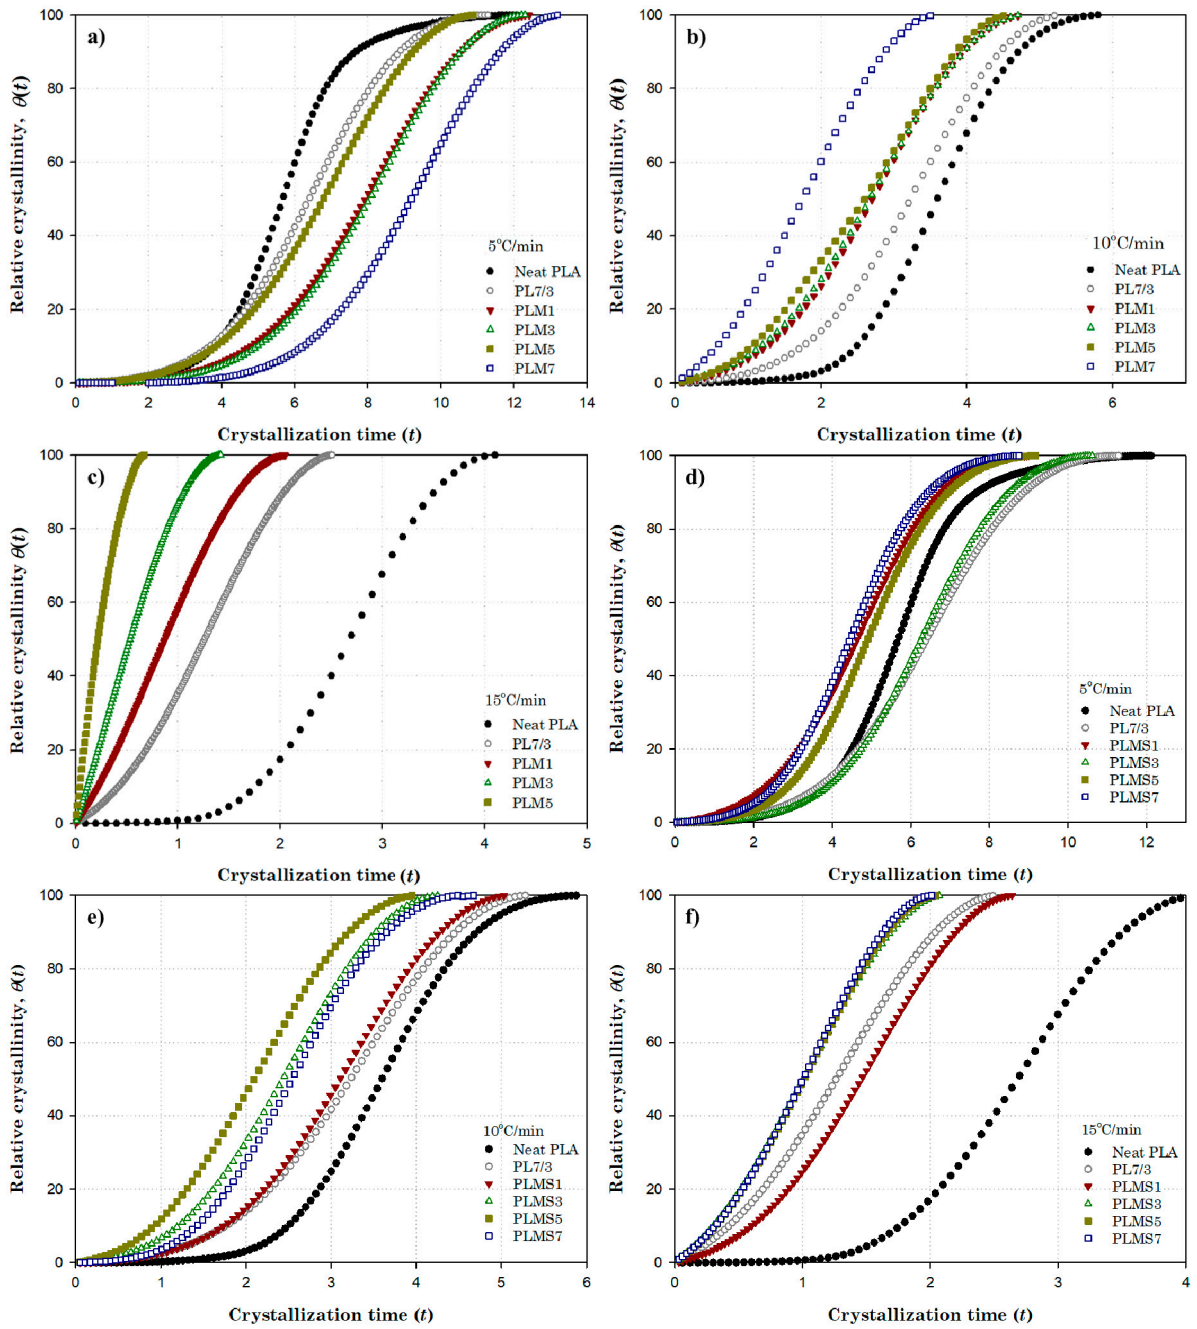

**Figure S5.** Relative crystallinity ( $\theta(t)$ ) vs. crystallization time ( $t$ ) for neat PLA, PL7/3, (a, b, c) PLM and (d, e, f) PLMS samples at heating rates of 5, 10, and 15°C/min.

**Table S2.** Non-isothermal properties of the PLA composites at heating rates of 5, 10, and 15°C/min.

| Sample          | Rate<br>(°C/min) | $T_{cc}$<br>(°C) | $\Delta H_{cc}$<br>(J/g) | $T_m$<br>(°C)  | $\Delta H_m$<br>(J/g) | $X_{cc}$<br>(%) |
|-----------------|------------------|------------------|--------------------------|----------------|-----------------------|-----------------|
| <i>Neat PLA</i> | 5                | 110.94           | 34.49                    | 169.20(162.90) | 39.26                 | 42.22           |
|                 | 10               | 126.22           | 39.59                    | 166.14         | 41.04                 | 44.13           |
|                 | 15               | 136.91           | 24.76                    | 166.71         | 25.61                 | 27.54           |
| <i>PL7/3</i>    | 5                | 128.13           | 25.40                    | 167.37         | 26.20                 | 28.17           |
|                 | 10               | 137.88           | 9.04                     | 167.04         | 9.50                  | 10.22           |
|                 | 15               | 141.66           | 1.66                     | 168.33         | 2.02                  | 2.17            |
| <i>PLM1</i>     | 5                | 134.90           | 16.71                    | 162.05         | 17.322                | 18.63           |
|                 | 10               | 138.69           | 3.05                     | 167.04         | 3.22                  | 3.46            |
|                 | 15               | 140.12           | 0.97                     | 167.10         | 1.03                  | 1.11            |
| <i>PLM3</i>     | 5                | 137.28           | 10.90                    | 167.41         | 11.18                 | 12.02           |
|                 | 10               | 139.69           | 2.55                     | 167.36         | 2.56                  | 2.75            |
|                 | 15               | 142.97           | -                        | 168.28         | -                     | -               |
| <i>PLM5</i>     | 5                | 138.45           | 8.00                     | 167.56         | 8.06                  | 8.67            |
|                 | 10               | 141.70           | 1.82                     | 167.59         | 1.84                  | 1.98            |
|                 | 15               | 145.17           | -                        | 169.47         | -                     | -               |
| <i>PLM7</i>     | 5                | 140.05           | 6.58                     | 167.74         | 7.15                  | 7.69            |
|                 | 10               | 142.51           | 1.72                     | 167.39         | 1.72                  | 1.85            |
|                 | 15               | 147.16           | -                        | 169.22         | -                     | -               |
| <i>PLMS1</i>    | 5                | 125.03           | 26.58                    | 165.84(170.12) | 27.88                 | 29.98           |
|                 | 10               | 138.34           | 13.16                    | 167.15         | 13.25                 | 14.25           |
|                 | 15               | 141.59           | 3.59                     | 166.84         | 4.19                  | 4.51            |
| <i>PLMS3</i>    | 5                | 129.27           | 26.49                    | 166.52         | 27.27                 | 29.32           |
|                 | 10               | 140.58           | 11.34                    | 168.33         | 11.47                 | 12.33           |
|                 | 15               | 143.62           | 2.34                     | 167.06         | 2.68                  | 2.88            |
| <i>PLMS5</i>    | 5                | 127.46           | 26.60                    | 166.23         | 26.78                 | 28.80           |
|                 | 10               | 138.20           | 16.69                    | 167.05         | 16.82                 | 18.09           |
|                 | 15               | 144.28           | 3.44                     | 167.06         | 3.77                  | 4.05            |
| <i>PLMS7</i>    | 5                | 127.35           | 26.70                    | 166.21         | 27.14                 | 29.18           |
|                 | 10               | 136.32           | 21.79                    | 167.11         | 21.89                 | 23.54           |
|                 | 15               | 145.66           | 3.77                     | 167.05         | 4.27                  | 4.59            |
